# Supplementary material for: Cyclodextrin-Based Hybrid Polymeric Complex to Overcome Dual Drug Resistance Mechanisms for Cancer Therapy
Source: MDPI journal article supplement (doi:10.3390/polym13081254), 2021-04-13
Supplement: s1 [file s1]

**Supplementary information**

**Cyclodextrin-based hybrid polymeric complex to overcome dual drug resistance mechanisms for cancer therapy**

**Lingjie Ke<sup>1,†</sup>, Zhiguo Li<sup>1,†</sup>, Xiaoshan Fan<sup>2</sup>, Xian Jun Loh<sup>3</sup>, Hongwei Cheng<sup>1,\*</sup>, Yun-long Wu<sup>1,\*</sup> and Zibiao Li<sup>3,\*</sup>**

<sup>1</sup>School of pharmaceutical science, Xiamen University, Xiamen 361102, China;  
32320191153429@stu.xmu.edu.cn (L.J.K.), lizhiguo@stu.xmu.edu.cn (Z.G.L),  
hongwei1026c@163.com (H.W.C)

<sup>2</sup>State Key Laboratory for Modification of Chemical Fibers and Polymer Materials, Donghua University, Shanghai 201620, China; xsfan@dhu.edu.cn.

<sup>3</sup>Institute of Materials Research and Engineering (IMRE), Agency for Science, Technology and Research (A\*STAR), 2 Fusionopolis Way, #08-03 Innovis, Singapore 138634, Singapore

\*Correspondence: hongwei1026c@163.com (H.W.C); lizb@imre.a-star.edu.sg (Z.L.); Tel.: +65-6319-4767 (Z.L.)

## Supporting Figures

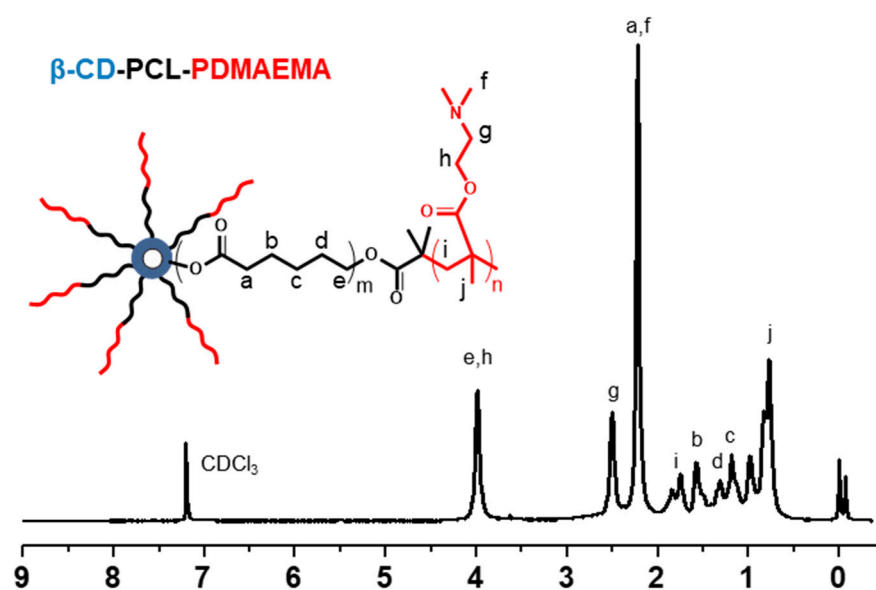

**Figure S1.**  $^1\text{H}$  NMR spectra of  $\beta\text{-CD-PCL-PDMAEMA}$ ,  $\text{CDCl}_3$  as solvent.

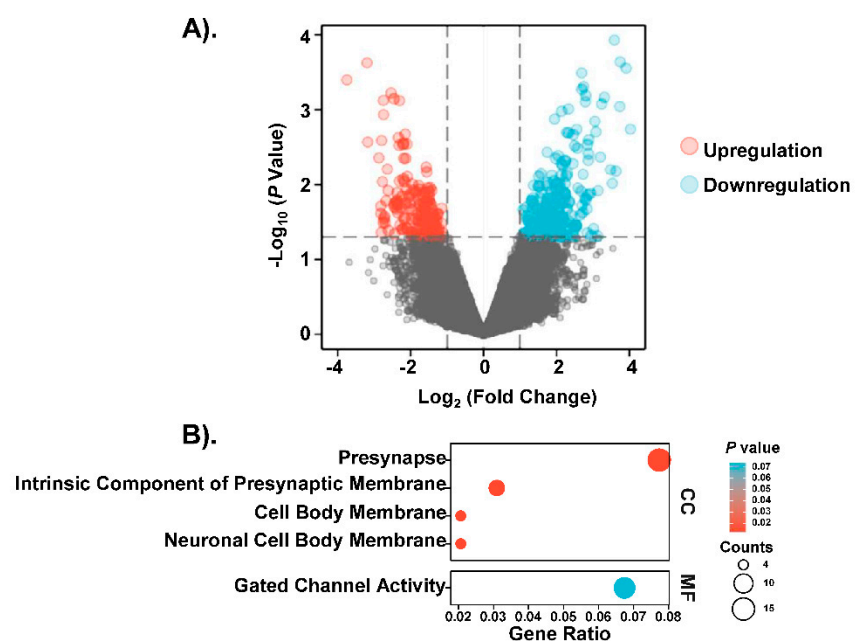

**Figure S2.** Enrichment analysis of doxorubicin-resistant hepatoma cells in GSE125180.

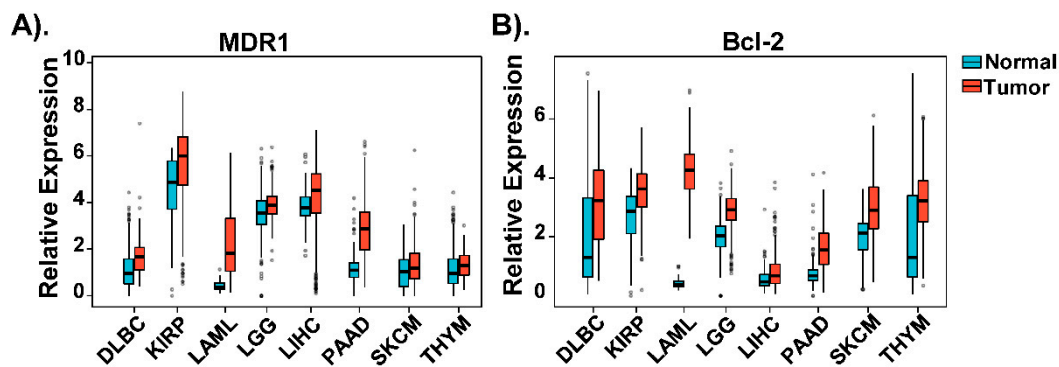

**Figure S3.** MDR1 and Bcl-2 are overexpressed in several cancer types.

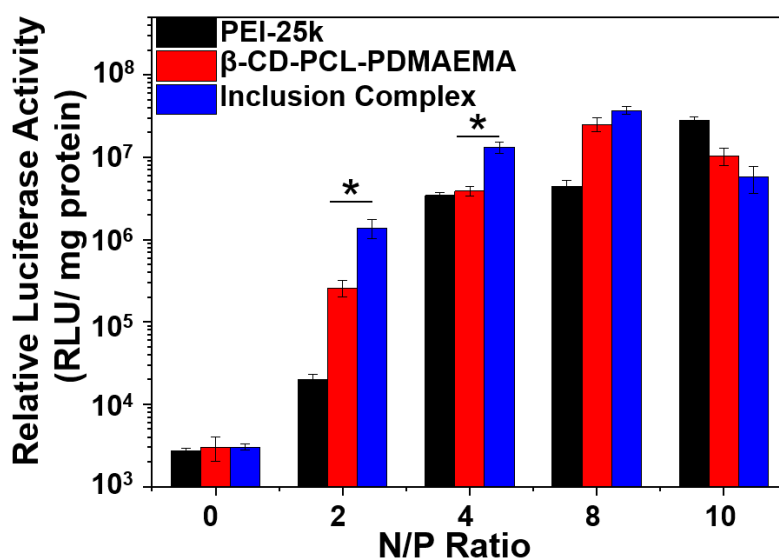

**Figure S4.** The Luciferase expression efficiency of PEI-25k only,  $\beta$ -CD-PCL-PDMAEMA/Nur77  $\Delta$  DBD, inclusion complex/Nur77  $\Delta$  DBD complexes (gradient weight ratios, from 0 to 10) incubated with HepG2 cells.

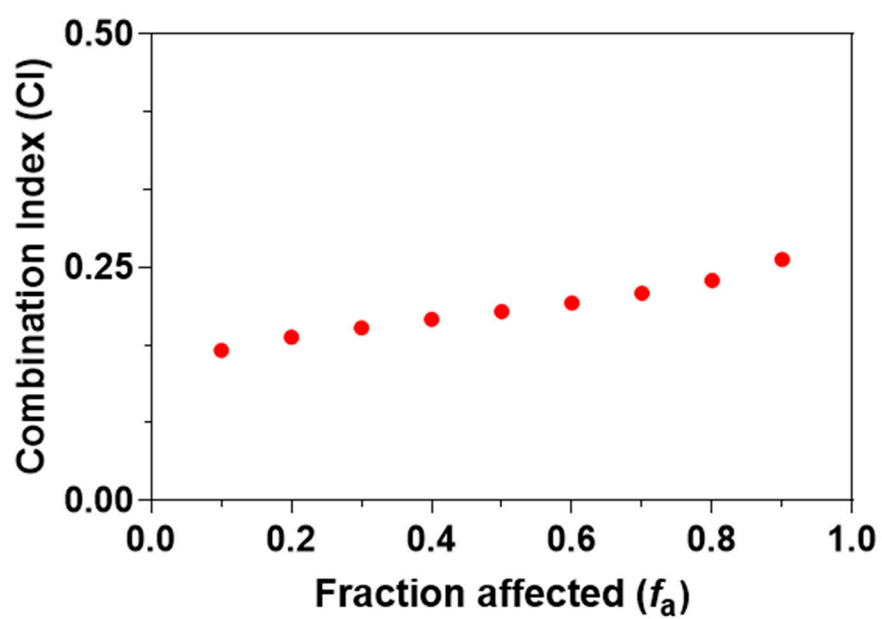

**Figure S5.** Combination index (CI) of DOX and Nur77 $\Delta$ DBD in inclusion complex/Nur77 $\Delta$ DBD-DOX against HepG2/MDR1-Bcl2 cells as a function of fraction affected ( $f_a$ ) determined via Chou-Talalay's isobolographic method and software CompuSyn.
